# Supplementary material for: A nanoluciferase SARS-CoV-2 for rapid neutralization testing and screening of anti-infective drugs for COVID-19
Source: PubMed Central journal article supplement (PMC7567097; doi:10.1038/s41467-020-19055-7), 2020-10-15
Supplement: 41467_2020_19055_MOESM1_ESM.pdf [file 41467_2020_19055_MOESM1_ESM.pdf]

**Supplementary Information for “A nanoluciferase SARS-CoV-2 for rapid neutralization testing and screening of anti-infective drugs for COVID-19” by Xie et al.**

| Primer name | Sequences (5'→3')                                                                              |
|-------------|------------------------------------------------------------------------------------------------|
| X83         | GTTCGTTTAATCAATCTCCATTGG                                                                       |
| X84         | GAACTTTCATTAATTGACTTCTATTTG                                                                    |
| X87         | CCAATGGAGATTGATTA AACGAACATGGTCTTCACACTCGAAGATTTC                                              |
| X88         | CAAATAGAAGTCAATTAATGAAAGTTCTTAATTAATTACGCCAGAATGC<br>GTTCGCACAG                                |
| X109        | CATTATACGAAGTTATATTTCGATGCGGCCGCGTCTCACACTAGCCATC<br>CTTACTGCGC                                |
| X112        | GTCGACTCTAGAGGATCCCACATCGATACGTCTCGTTTTTTTT<br>TACTGTAATACGACTCACTATAGGATGTCTGATAATGGACCCCAAAT |
| Cov-T7-N-F  | C                                                                                              |
|             | TTTTTTTTTTTTTTTTTTTTTTTTTTTTTTTTTTTTTTTTTTTTTTTAGGCCTGAGTTGAGT                                 |
| polyT-N-R   | CAGCAC                                                                                         |

**Supplementary Table 1. Primers for construction of the subclone pCC1-F7-Nluc and amplifying N gene.**

| Primer Name | Sequences (5'->3')       |
|-------------|--------------------------|
| cov-1V      | ATTAAAGGTTTATACCTTCCCAGG |
| cov-655V    | AGCTGGTGGCCATAGTTAC      |
| cov-1321V   | AGGTGCCACTACTTGTGG       |
| cov-1925V   | CTGCTCAA AATTCTGTGCG     |
| cov-2572V   | CTACTAGTGAAGCTGTTGAAGC   |
| cov-3225V   | CTGTTGGTCAACAAGACGG      |
| cov-3824V   | GTTTCAAGCTTTTTGGAAATG    |
| cov-4431V   | TGCCTGTCTGTGTGGAAAC      |
| cov-4990V   | CAACATTAACCTCCACACGC     |
| cov-5525V   | ACTTGTGGACAACAGCAG       |
| cov-6109V   | GAAACCTGCTTCAAGAGAG      |
| cov-6737V   | ACACGGTGTTTAAACCGTG      |
| cov-7382V   | CAAATGGCCCCGATTTTCAG     |
| cov-7930V   | TCAGCGTCTGTTTACTACAG     |
| cov-8481V   | CTTTTAAGTTGACATGTGCAAC   |
| cov-8995V   | ATCAGCTTGTGTTTTGGC       |
| cov-9534V   | CTGTACTCTGTTTAAACACC     |
| cov-10094V  | GAGGGTTGTATGGTACAAG      |
| cov-10680V  | ACGCTGCTGTTATAAATGG      |
| cov-11188V  | ACCTTCTCTTGCCACTG        |
| cov-11707V  | AGTTTCTACACAGGAGTTTAG    |
| cov-12205V  | GAAGAAGTCTTTGAATGTGG     |
| cov-12806V  | GTACTTGCACTGTTATCCG      |
| cov-13441V  | GTCAGCTGATGCACAATCG      |
| cov-14062V  | GATAATCAAGATCTCAATGG     |
| cov-14618V  | CTACGTGCTTTTCAGTAG       |
| cov-15170V  | ATCAATAGCCGCCACTAG       |
| cov-15677V  | ACGCATATTTGCGTAAAC       |
| cov-16273V  | TCATTAAGATGTGGTGCTTG     |
| cov-16853V  | GTGATGCTGTTGTTTACCG      |
| cov-17444V  | CTCAATTACCTGCACCAC       |
| cov-18037V  | AAGCTGAAAATGTAACAGG      |
| cov-18588V  | TGTCTTATGGGCACATGG       |
| cov-19211V  | GATATCCTGCTAATTCCATTG    |
| cov-19840V  | ATTTGGGTGTGGACATTG       |
| cov-20459V  | AACAGATGCGCAAACAGG       |
| cov-20934V  | TACGCTGCTTGTCGATTG       |
| cov-21521V  | TGTTATTTCTAGTGATGTTCTTG  |
| cov-22092V  | TGGACCTTGAAGGAAAAC       |
| cov-22685V  | TCCACTTTTAAGTGTTATGGAG   |
| cov-23203V  | AGGCACAGGTGTTCTTAC       |
| cov-23840V  | GTACACAATTAACCGTGC       |
| cov-24428V  | CACAAGCTTTAAACACGC       |
| cov-25068V  | TCTCTGGCATTAAATGCTTC     |
| cov-25624V  | CACTTTGTTTGCAACTTGC      |
| cov-26245V  | CATTCGTTTCGGAAGAGAC      |
| cov-26778V  | GTCTTGTAGGCTTGATGTG      |
| cov-27372V  | ATGGAGATTGATTAACGAAC     |
| cov-27875V  | TTGTCACGCCTAAACGAAC      |
| cov-28994V  | CAACAAGGCCAAACTGTC       |

---

|            |                       |
|------------|-----------------------|
| cov-29611V | GTGCAGAATGAATTCTCG    |
| cov-28404V | GTTTACCCAATAATACTGCG  |
| pCC1-F     | CGACAGGTGCTGAAAGCGAGC |
| M13F       | GTAAAACGACGGCCAG      |
| M13R       | CAGGAAACAGCTATGAC     |

---

**Supplementary Table 2. Primers for sequencing the seven subclones.**

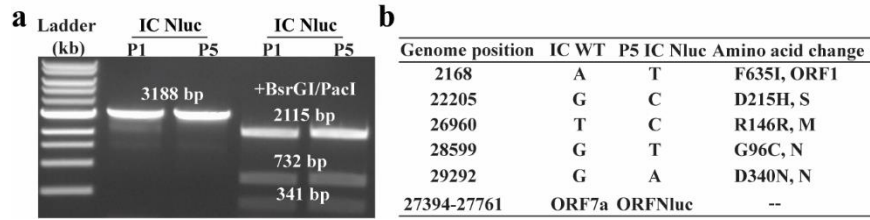

**Supplementary Figure 1. Stability of SARS-CoV-2-Nluc on A549-ACE2 cells.** (a) Restriction enzyme digestion of RT-PCR products. SARS-CoV-2-Nluc viruses were passaged five times on A549-ACE2 cells. The RT-PCR products (nucleotides 25,068-28,099 of viral genome) from the P1 and P5 viral RNA and their digestion products with BsrGI and PacI are shown. (b) Summary of full-genome sequences of P1 and P5 IC Nluc viruses on A549-ACE2 cells. Nucleotide and amino acid differences from the IC WT are indicated.
